# Supplementary material
Source: PubMed Central journal article supplement (PMC7953111)
Supplement: sj-pdf-1-jvd-10.1177_1040638720978381.pdf [file sj-pdf-1-jvd-10.1177_1040638720978381.pdf]

**Supplementary Table 1.** Targeted NGS primer pairs designed for amplifying conserved regions of 62 different equine pathogens.

| Target                 | Forward                           | Reverse                           |
|------------------------|-----------------------------------|-----------------------------------|
| AMPL1652307_1          | ATGCAACTGAGGTTTTAACATCTCATTG      | CTCCGATTGGCAAACGACCAACA           |
| AMPL1652307_2          | TTGTAAGTGGGTTTTAACATCTCATTG       | CTCCGATTGGCAAACGACCAACA           |
| AMPL1652307_3          | TTGTAAGTGGGTTTTGACATCTCATTG       | CTCCGATTGGCAAACGACCAACA           |
| AMPL1652268            | GGCAATAGTTCGATTGAATTAAGTAGAACTT   | TGAATAGTAACCTCTTTCTTATCAGTACTCA   |
| NeosH ITS_1.26453      | GAGCTTGATCCCTCTCCTTTGG            | ATTTGTTGTTTAAAATAACGGTGTGGGA      |
| NeosH ITS_1.8107       | AGGGACTCGGTCCTGGA                 | ACATTATAGTTTTTAGTAGGTAATCTGAAAGCG |
| EEErPmerase_1.1.129103 | TACACCAGTGACAAGCCTCCT             | CTGTAACCCCTTTTGGTTCCAT            |
| EEErPmerase_1.1.72623  | CGTAAACCTAAACCAGGCAAACGA          | CTGGTGTACTGGAGGGTATCTGA           |
| EEErPmerase_1.3.114610 | CTTTGTGCCTGTTAAGGCCAAG            | CCCTTCTCCTGACTCTTGAGC             |
| EEErPmerase_1.3.14226  | ACACCGCACCTGATTTTACAC             | CCGATAATTGTGGTTAACGGGTATCTG       |
| EEErPmerase_1.3.194592 | TGCCGTCTCCAGTAGTGAAATG            | ATCTGCAGATCTCCAGCTGAC             |
| EEErPmerase_1.3.51867  | ATTATCGGGTTATGCACCTGTGT           | GTGGGATAAGCGTCTGCATCC             |
| EEErPmerase_1.3.7079   | AAGGGAACCCACATGGATGG              | CAGCAAAGTAACGCCAGGAGTA            |
| EEErPmerase_1.4.86402  | CTGCAGATGTCTACGTCAATGGTG          | GTGAAAGGTGTGTGCACGATAC            |
| EEErPmerase_1.4.92029  | CTTCGAACGATGGAAAAGGGACAA          | GAATTGGACAGTTTCTGCTTTACTG         |
| C_perf_beta_1.1.30019  | GGCAAACCTACTACTATAACTAGAAATAAGACA | AATTGCAGTAGAATTAGTAACATCATGCAA    |
| C_perf_beta_1.1.36446  | TCAAGTGTGAAAAGAGCAATGTTTCAT       | ATCTTCATTTTTACTTGAAGAGTCAACAGATT  |
| C_perf_beta_1.1.38216  | TCGATGATAAATATTCATCTGAAATGACAAC   | TTGAACCTCTATTTTGTATCCCATTGT       |
| AMPL1652244            | CGCTACAGTGATGTCTCTCAGT            | GCCAGCATCTGCATTTGTCTTA            |
| AMPL1652273_1          | CCCTAGTGTTCCTTTTCCAAAAACC         | TTCTTGCATGACCGGTACGAA             |
| AMPL1652273_2          | CCCCTGTGTTCCTTTTCCAAAAACC         | TTCTTGCATGACCGGTACGAA             |
| AMPL1652202            | ACTTTCGATTTTGGCTATCTCCGTT         | TTTCGTTTGTCCCTGGGATTGT            |

## Targeted NGS panel for detection of equine pathogens

|               |                               |                                |
|---------------|-------------------------------|--------------------------------|
| AMPL1652203   | GCCAAGCCTAAAAAGCTCTTTTGTC     | GCGTCGCTTACTAAGTCTCCATC        |
| AMPL1652196   | CGGCAGTATCTGGTTCAGTGAT        | CATCACTCATCTTCGCTGCTAAAAA      |
| AMPL1652197   | AAACGGAAGTTGAATATTTCTGTTCCAA  | CCAAATGACAAAGGAACAGAAAGAGTC    |
| TM01_1.3313   | TCGGACACCCTCTGAACGA           | GGGAAGACGGTATAAGAAGTCTCG       |
| TM01_2.3313   | TCGGACACCCTCTGAACGA           | GGGAAGACGGTATAAGAAGTCTCG       |
| AMPL1652282_1 | GGGTGAACTGTCCAAGCTTCAT        | GCAGCATGTTTAGCGCGATTATAATATAAC |
| AMPL1652282_2 | GGGTGAACTGTCCAAGCTTCAT        | GCAGCATGTTTAGCGCGATTATAATATATA |
| AMPL1652282_3 | TGGTGAACGTGTCCAAGCTTCAT       | GCAGCATGTTTAGCGCGATTATAATATAAC |
| AMPL1652274_1 | CACTACATCAAGTGTCACCTCCATACA   | GAGGTGCATCTCGACATAAAGCT        |
| AMPL1652274_2 | CACTACATCAAGTGTCACCTACATACA   | GAGGTGCATCTCGACATAAAGCT        |
| AMPL1652274_3 | CACTACATCAAGTGTCACCTCTCATACA  | GAGGTGCATCTCGACATAAAGCT        |
| AMPL1652274_4 | CACTACATCAAGTGTCACCTCTATACA   | GAGGTGCATCTCGACATAAAGCT        |
| AMPL1652274_5 | CACTACATCAAGTGTCACCTCCACACA   | GAGGTGCATCTCGACATAAAGCT        |
| AMPL1652275   | CCAAGTCTACGCACATGATGCA        | ATGGTCTCGGAGATCTTTGTGC         |
| AMPL1652182   | GCGCAAAAATTTGAGCCCAAGT        | CGTTCTCCATCTTGTCGTGGAA         |
| AMPL1652183   | CAAGCTCAGCAACATGAACCAG        | TGGTGTGATCTCCTCCTTGAT          |
| AMPL1652278   | CTTGGAATGAGCAACAGAGACTTC      | CCTTGTCTGCACACAAAAGCTG         |
| AMPL1652200   | AGTAAAAGTCGTAACAAGGTTTCCGT    | ATCGATGCCGGAACCAAGAGAT         |
| TM12_1.1051   | CTTTCCCCGTCAGCGATC            | ACTTCAACAGGCCAGTCT             |
| TM12_2.1051   | CTTTCCCCGTCAGCGATC            | ACTTCAACAGGCCAGTCT             |
| TM13_1.868    | GGGAAGGAAATCTCATTGTGGAAGT     | AAATCGTACAGGTACGGTTTCCC        |
| TM13_2.868    | GGGAAGGAAATCTCATTGTGGAAGT     | AAATCGTACAGGTACGGTTTCCC        |
| AMPL1652250_1 | AACGTGGAGCCGTTCTTAATGT        | GGGCTTATGTAAGTCAATGTCATAGTGA   |
| AMPL1652250_2 | AACGTGGAGCCGTTCTTAATGT        | GGGCTTATGTAAGTCAACGTCATAGTGA   |
| AMPL1652250_3 | AACGTTGAGCCGTTCTTAATGT        | GGGCTTATGTAAGTCAATGTCATAGTGA   |
| AMPL1652212_1 | GCTGGCCGATGTCTTTTTCAA         | GCAAGTTTGTATGTACGGACACTGA      |
| AMPL1652212_2 | GCTAGCCGATGTCTTTTTCAA         | GCAAGTTTGTATGTACGGACACTGA      |
| AMPL1652213   | CACTTTCGGGTTATGCCTGGAA        | GAGGTGCATCTCCTTAATGTCCTTTCC    |
| AMPL1652195   | CACTGCTAGCTATTATCTTAGGTGGTATG | ACTGTTCATAGAACCAGACCAGTCA      |
| AMPL1652267_1 | GACTGCATTTATTCTGCAGACTTTGG    | GGTCGACTTTATGTGGTTCTCCAATTAT   |
| AMPL1652267_2 | GACTGCATTTATTCTGCAGACTTTGG    | GGTCGACCTTATGTGGTTCTCCAATTAT   |

## Targeted NGS panel for detection of equine pathogens

|                       |                                  |                                   |
|-----------------------|----------------------------------|-----------------------------------|
| AMPL1652267_3         | GACTGCATTTATTCCGCAGACTTTGG       | GGTCGACTTTATGTGGTTCTCCAATTAT      |
| AMPL1652218_1         | TTAATATTGCATGATAAGGCAACTTCAGT    | AGATGGAGATGAGAAAAAGTGATCTATATTACC |
| AMPL1652218_2         | TTAATATTGCATGATAAGGCAACTTCAGT    | ATATGGAGATGAGAAAAAGTGATCTATATTACC |
| AMPL1652219           | GGGATCAGGACACACAGTGA             | CTCTTGAAGGAGCATTAGGTAACATCATTAA   |
| AMPL1652265_1         | GAGGAGCACATCGTCTACACTG           | GAACAAGACCTCCTGGTAGAACTC          |
| AMPL1652265_2         | GAGGAGCACATCGTCTACACTG           | GAACAAGACCTCCTGGTAGAAGTC          |
| AMPL1652266_1         | AGAAGGACGGTGATAAGTGGGT           | CCATCAATCAACTCAGTCTTGCCAT         |
| AMPL1652266_2         | AGAAGGACGGTGATAAGTGGGT           | CCATCAATCAACTCAGTCTCGCCAT         |
| AngioCntnITS_1.113368 | TGTGTGCACGTTTTGCGT               | ATACATCCTGTGTATCTCGTTCCA          |
| AngioCntnITS_1.116442 | TTGAATTGCTGGATATGGTTGATAGTG      | TATCTCGTTCCACATTTTCACGTGT         |
| AngioCntnITS_1.95464  | TCGCTAAAGTTGGTGGTATCGT           | TGCACACACATGCATACACG              |
| AMPL1652299           | GTGTCCATCGCCAAGGAGAT             | TCCTTGGTCTCGACCTCCTT              |
| AMPL1652300           | CGTCACCAACCGTCTGCT               | CCTTCCTTGCCGACCTTG                |
| AMPL1652179           | CAAGCAGGCTTTTCGCGAATATG          | GCTAGCTTATACCCAAGCATTATCCAG       |
| AMPL1652204           | GGGTCGATAACATGGGATCTTAAGTTT      | GACCGCTTATAAGCTACTGGTTTCA         |
| AMPL1652205           | GTGAAAAGAACCCTTGTTAAGGGAGT       | TCCTCCACAAGGTCTTACCCAT            |
| AMPL1652225_1         | CCCAAGGCTTTGCACCATTTTC           | CCACCGATTCAAATTTAGCTTGATATACAT    |
| AMPL1652225_2         | CCCAAGGCTTTGCACCATTTTC           | CCACCGATTCAAATCTAGCTTGATATACAT    |
| AMPL1652225_3         | CCCAAGGCTTTGCACCATTTTC           | CCACCGATTCAAACCTAGCTTGATATACAT    |
| AMPL1652226_1         | GTATAGGACTCTGATGAGTGTCAAAATAGG   | CCATCAGTCATTACCCAATAACAGTCTC      |
| AMPL1652226_2         | GTATAGGACTCTGATGAGTGTCAAAATAGG   | CCATCAGTCATTACCCAATAACAGTTTC      |
| AMPL1652226_3         | GTATAGGACTTTGATGAGTGTCAAAATAGG   | CCATCAGTCATTACCCAATAACAGTCTC      |
| EHV_4_1               | CTCTGGAGCCAATTAGGAAATGTAAAC      | GTTTCAGTTGGTAGAAGCGTTTG           |
| TM02_1.243            | GGTTTTGAAGTCGTTGTTCTAACTCC       | CTTGAGTACGAGGCGGTGGA              |
| TM02_2.243            | GGTTTTGAAGTCGTTGTTCTAACTCC       | CTTGAGTACGAGGCGGTGGA              |
| NetF_1.49778          | GATATGACCAAAATTCGTATCATGCTCT     | TGGTTCTTTTGCAACACGATTTTCT         |
| NetF_1.59223          | GTTATAGTATTGGTGGAAATGTTCCGT      | TCTTGTTAAACACTATGTTCCAAGAAGC      |
| NetF_1.64905          | TAGGGAATATTACACAAGTAAAAGCTAATTCC | TGCACTGTAATAAGTTCTGTTTTAATTAATC   |
| NetF_1.85319          | TTGCTCTTAAGGCACCAAAAGG           | ATAAATTCTACAGTATGATTCTCCAATCAAG   |
| AMPL1652296           | CGCACATTTCCGAACCTTCACTT          | TGGGACTTGTTTCAGGTTGTTCTG          |
| AMPL1652298           | CCAACGACGGCATCTCGAT              | CGATGCGGTTGATTTCTTCCAG            |

Targeted NGS panel for detection of equine pathogens

|               |                                  |                                 |
|---------------|----------------------------------|---------------------------------|
| AMPL1652258   | TGCAATTTGGTTATACAAGTCGCAGTA      | CCTTCATATCTACACACATCAGGTTGTTT   |
| AMPL1652259_1 | TTTATTAGAACTGGTAGTTGGTGGAGTTTC   | CGACACCTTAGCAACAGTAACATAAAC     |
| AMPL1652259_2 | TTTATTAGAACTGGTAGTTGGTGGAGTTTC   | CGACACCTTAGCTACAGTAACATAAAC     |
| AMPL1652259_3 | TTTATTAGAACTGGCAGTTGGTGGAGTTTC   | CGACACCTTAGCAACAGTAACATAAAC     |
| Klebsiella_1  | CGACCTGATTGCATTTCGCCAC           | AGCACGTAGATGAACTCTTCCTCAT       |
| TM06_1.42     | AAGAATAGCAGCGTTCGGAGGA           | TCTTCGATCTCGAGAGGAACTC          |
| TM06_2.42     | AAGAATAGCAGCGTTCGGAGGA           | TCTTCGATCTCGAGAGGAACTC          |
| AMPL1652242_1 | CTACTGCTGAACAAAAGTCTATGCAAC      | CATATGAATTCACTGTTGCTCACTGTTG    |
| AMPL1652242_2 | CTACTGCTGAACAAAAGTCTATGCAAC      | CATATGAACTCACTGTTGCTCACTGTTG    |
| AMPL1652242_3 | CTACTGCTGAATAAAAAGTCTATGCAAC     | CATATGAATTCACTGTTGCTCACTGTTG    |
| AMPL1652243_1 | CGAGGGCTCATTCTACTCCATT           | CCCATCAGTCATTACCACTACACAAG      |
| AMPL1652243_2 | CGAGGGCTCATTCTACTCCATT           | CCCATCAGTCATCACCCTACACAAG       |
| AMPL1652271_1 | GCGACAGCCTACAAGCTACAAT           | CCAAGTACGGTATACGTGAGT           |
| AMPL1652271_2 | GCGACAGCCTACAAGCTACAAT           | CCAAGTACGGTGTACGTGAGT           |
| AMPL1652246_1 | GAATTATTAGCAGATGTAGACAGCATTCCCT  | CAGTTGATGTGATTTCAAGCTTACCA      |
| AMPL1652246_2 | GAATTATTAGCAGATGTAGACAGCATTCCCT  | CAGTTGATGTGATTTCAAGCTGACCA      |
| AMPL1652246_3 | GAATTATTAGCAGATGTAAACAGCATTCCCT  | CAGTTGATGTGATTTCAAGCTTACCA      |
| AMPL1652246_5 | GAATTATTAGCAGATGTAAAGCAGCATTCCCT | CAGTTGATGTGATTTCAAGCTTACCA      |
| AMPL1652198   | GTAGTTTCAAGTCTAAGTAGCTCAGCAA     | CACTTGCTTCAGGACCATATTTCTCT      |
| AMPL1652199   | TGATACACCTGAAACAAAGCATCCT        | GCTTCACTTTTTCTTAAAAGTTGTTTCATGT |
| AMPL1652301_1 | GGGTTGACCTTAGGTGGTGATT           | GTATGCGCCAACCTATAAATATATCGGTAT  |
| AMPL1652301_2 | GGGTTGACCTTAGGTGGTGACT           | GTATGCGCCAACCTATAAATATATCGGTAT  |
| AMPL1652302_1 | TGTAGTATGTATTTGTGTGCTGTGTGTAG    | TTTTGGCATTTTTGGTCGATTTTGAAC     |
| AMPL1652302_2 | TGTAGTATGTATTTGTGTGCTGTGTGTAG    | TTTTGGCATTTTTGGCCGATTTTGAAC     |
| AMPL1652302_3 | TGTAGTATGTATTTGTGTGCTGTGTGTAG    | TTTTGGCATTTCGGCCGATTTTGAAC      |
| AMPL1652302_4 | TGTAGTATGTATTTGTGTGCTGCGTGTAG    | TTTTGGCATTTTTGGTCGATTTTGAAC     |
| PHF_1         | CACAAGTTGGTTCAATTTCTGC           | ATTTTCTCCGGGTTTGTATAAAGT        |
| PHF_2         | CACAAGTTGGTTCAATTTCTGC           | ATTTTCTCCGGATTTGTATAAAGT        |
| AMPL1652255_1 | GCTCGCAATAAGACTGGTCGTT           | TGTCGCTTCGTAAGGTTCACTC          |
| AMPL1652255_2 | GCTCGCAATAAGACTGGTCGTT           | TGTCGCTTTGTGAGATTCACTC          |
| AMPL1652255_3 | GTTTCGCAATAAGACTGGTCGTT          | TGTCGCTTCGTAAGGTTCACTC          |

## Targeted NGS panel for detection of equine pathogens

|               |                                |                                 |
|---------------|--------------------------------|---------------------------------|
| AMPL1652255_5 | GCTCGCAATAAGACTGGTCGTC         | TGTCGCTTCGTAAGGTTCACTC          |
| AMPL1652256_1 | TGGTCGTTGCTTGGCTTTTCTA         | CGCTATTAACGCTGGGCTTTTG          |
| AMPL1652256_2 | TGGTCGTCACCTGGCTGTTCTA         | CGCTATTAACGCTGGGCTTTTG          |
| AMPL1652256_3 | TGGTCGTTACTTGGCTGTTCTA         | CGCTATTAACGCTGGGCTTTTG          |
| AMPL1652256_4 | TGGTCGTCACCTGGCTTTTCTA         | CGCTATTAACGCTGGGCTTTTG          |
| AMPL1652190   | TGAAACAACATGACGGGAGGTAA        | GGGAATCAAAATAAAGATTCCCTCTATGCT  |
| AMPL1652231_1 | TTTATTAGCATCGCCATTATATGCAAATGG | GTTCCCTCTCGCGTGATCATAAAGATTAATA |
| AMPL1652231_2 | TTTATTAGCATCGCCATTATATGCTAATGG | GTTCCCTCTCGCGTGATCATAAAGATTAATA |
| AMPL1652232   | GGGCATAATGAGTACTTCGATAGAGGA    | GAGGGCTGTATACGCCTAATACATC       |
| AMPL1652233   | ATATGTTATAGCGACAGCACCAAATATGT  | TGTAATACCGGTCTCTATATTCCCTGTTAC  |
| AMPL1652214   | GGATGGATTGATTGGCTATGATTTGG     | GTTTGTAACACTCCACTTTGGTTGAA      |
| AMPL1652215   | CTTCAATTGGAGAGACAATAATTGATGACA | AGCTTTACCTGTTTCTGGGCTAAAAT      |
| AMPL1652216   | GGAGCTGTAGAATGGAAAGAATTAGATGG  | GCCATCTATTTTCAGTGTAACCTACTTTCAT |
| AMPL1652279   | TGACGCGACGTACTCGAAAAAT         | CATATGCAGGCCATCGACTTCT          |
| AMPL1652280   | CAGAAACAGGAATGCTCGGGTAT        | GTCACCGGACATTCCTGAATTG          |
| AMPL1652277_1 | TTGCTCGGGAAAAGAAGCCAAG         | TACCAGATAGCCCTGCTTCCTT          |
| AMPL1652277_2 | TTGCTCGGGAAAAGAAGCCAAG         | TACCAGATAGCTCTGCTTCCTT          |
| AMPL1652277_3 | TTGCCCGGGAAAAGAAGCCAAG         | TACCAGATAGCCCTGCTTCCTT          |
| AMPL1652269_1 | CGTACGGCGACTCCAAGATTAT         | CCCATCAGGTTTATCATTAAACATCGATGA  |
| AMPL1652269_2 | CGTACGGCGACTCCAATAATTAT        | CCCATCAGGTTTATCATTAAACATCGATGA  |
| TM05_1.687    | GTTTACGATGTGATCTACTTCGACACA    | CCCCGAACACTTCTTTGAAAACC         |
| TM05_2.687    | GTTTACGATGTGATCTACTTCGACACA    | CCCCGAACACTTCTTTGAAAACC         |
| AMPL1652010_1 | AATGCGACATTGACTACAAAATCAGC     | TGTATTTCTATTCCAAGTCATCAGCA      |
| AMPL1652010_2 | AATGCGACATTGACTACAAAATCAGC     | TGTATTTCTATTCCAAGTCATCAGCA      |
| AMPL1652010_3 | AATGCGACATCGACTACAAAATCAGC     | TGTATTTCTATTCCAAGTCATCAGCA      |
| AMPL1652237   | CTCAGGGCGTGGGTATTAATGAG        | CTGTTCCGGCTTTTCCAGATTA          |
| AMPL1652238   | GAGTAAAATAGGAGGAACCGCTGAA      | AAAAATGAGCCAAGCTGGTTAAGC        |
| AMPL1652201   | CGGAGGGATCATTACCGAGTTT         | GTGCGTTCAAAGATTCGATGATTCA       |
| AMPL1652257   | CATTGTCGGTTCTGGGAGCTAT         | GCTGAAGGTCATTTGTGAAGAGAGT       |
| Lyme_1        | AGCAAATTTAGGTGCTTTCCAA         | GCAATCATTGCCATTGCAGA            |
| AMPL1652234   | TCGTCAAGATGGAGTTTCTATGC        | GGGTCATTGATAAAATCGTCTGGAGTATAG  |

## Targeted NGS panel for detection of equine pathogens

|                         |                                  |                                 |
|-------------------------|----------------------------------|---------------------------------|
| AMPL1652235_1           | ATCAAACAGTGAAGCTCAACGAGA         | CCTTACTAATCAAGAGTGGAATTGCAAAAG  |
| AMPL1652235_2           | ATCAAACAGTGAGGCTCAACGAGA         | CCTTACTAATCAAGAGTGGAATTGCAAAAG  |
| AMPL1652236             | GGTTTGGCGACAAATGCAGTATT          | CGACAATTTGATTATCTTCATCACTAAGCT  |
| AMPL1652239             | TGCAAGTGCGGGAATCTATAAAACA        | TCTACGATTCAATGCGCTAATAGAGAAATT  |
| Listeria_23S_1.2.207564 | TGTCAAGAAAAGCCTCTAGGAAGAGTAG     | CGGTTTTGCAGAGACCTGTGT           |
| Listeria_23S_1.2.29471  | AGACAACCAGGATGTTGGCTTA           | CCTTAGATATTCGGTGGAAAGGGATTCT    |
| Listeria_23S_1.2.49805  | ATCTAAGGTTTCCTGAGGAAGGC          | TCTTGACAGCGTGAAATCAGGA          |
| Listeria_23S_1.2.83661  | CGACACAGGTAGATGAGGAGAGA          | GCCGAAGCTAAGCACTCCT             |
| Listeria_23S_1.3.105784 | GCTTCGGCGAAGGTACGA               | ACACGTCTCTTCGGCTCCT             |
| Listeria_23S_1.3.18366  | AGACAGTTCGGTCCCTATCCG            | TTTGTCCGCTCCATGTATCGC           |
| Listeria_23S_1.3.92992  | GATGGACACACCGCTGGT               | TTGGTTAAGTCCTCGATCGATTAGTATTT   |
| AMPL1652261             | GTGGGTGACGTCATCGGTAAATA          | CGACGAAATCCACCGTCTCTTTTT        |
| AMPL1652262_1           | CGAAGATCGCCCATGAACTGAT           | GCTGATGTCTTCGTTTTCAACGTAG       |
| AMPL1652262_2           | CGAAGATCGCCCATGAACTGAT           | GCTGATGTCTTCATTTTCAACGTAG       |
| AMPL1652262_3           | CGAAGATCGCCCATGAGCTGAT           | GCTGATGTCTTCGTTTTCAACGTAG       |
| AMPL1652191_1           | CTATACCACGCTACAGCGTGTT           | CCAGTTCAATGTAAGATCAACATCTTCAG   |
| AMPL1652191_2           | CTATACCACGTTACAGCGTGTT           | CCAGTTCAATGTAAGATCAACATCTTCAG   |
| AMPL1652192             | GATGATCTCAGTGGGCGTTCTTA          | GTAATCCCACGGACTCTTCCATC         |
| AMPL1652294             | AAGTGGCTGGGTAGTTATACGC           | CCCGTACTCTCTTGAGAAAAGTAGC       |
| AMPL1652295_1           | CCGCCTACTACTAACTATGTACTGTACT     | GGCATAAAGTTAAACATTGACCCGTAA     |
| AMPL1652295_2           | CCGCCTACTACTAACTATGTACTtagt      | GGCATAAAGTTAAACATTGACCCGTAA     |
| TM03_1.958              | GGTGTGAAGGAGTCTCTCGTT            | ACCGATGGGAACCCTCAC              |
| TM03_2.958              | GGTGTGAAGGAGTCTCTCGTT            | ACCGATGGGAACCCTCAC              |
| S_equi_type_1           | atgctgagagttgatcaaaacactt        | ccattttattcccccttttgtttta       |
| AMPL1652224             | GTTTATGTGCTTCGGCACGTTT           | AAGTCCAACAGGTAATAAAACCCGA       |
| AMPL1652289             | GGTAGTTCACTGGACTTCTTATTACCG      | CGGAAATAGCCGTTAACGCTACT         |
| AMPL1652220_1           | GTCACCTCTGACTAAAGGGATTTTAGG      | TGCCACTTCGGTTGTAATAGTTCC        |
| AMPL1652220_2           | GTCACCTCTGACTAAAGGGATTTTAGG      | TGCCACTTCGGTTGTAACAGTTCC        |
| AMPL1652221             | GCCAGTTGCATGGGACTCATAT           | ATCTGCCTAGCCCTACTAGCAA          |
| AMPL1652303             | AAAGTTCTGTATAGATCCCATTTCTCTTAAGT | GGAAAAGGAAAAGTTAAACTAGTTGGTCCTA |
| AMPL1652304             | TTTTTCGAAAAGCAATTCATATGGTTG      | AGATCTTGTTGGGAAAAGTGTGGT        |

Targeted NGS panel for detection of equine pathogens

|                       |                                   |                                   |
|-----------------------|-----------------------------------|-----------------------------------|
| EHV_3_gB_1            | gtttgctccgattacgtgtattat          | ctgaatctcgctgtagtcataag           |
| Neospora_1            | GCCAGTGCCTCAATCCTGTAAC            | CTCGCCAGTCAACCTACGTCTTCT          |
| Neospora_2            | GCCAGTGCCTCAATCCTGTAAC            | CTCGCCAGTCCACCTACGTCTTCT          |
| Neospora_2_1          | GGAGGTATAGCAGAGAGAATTCGTG         | AGGCTGATTTCAACGTGACGAA            |
| Neospora_2_2          | GGAGGTATAGCAGAGAGAATTCGTG         | AGGCTCATTTC AACGTGACGAA           |
| Neospora_3            | CCCAGTGCCTCAATCCTGTAAC            | CTCGCCAGTCAACCTACGTCTTCT          |
| TM08_1.410            | CGGGAAAAACGGTGGGTAC               | GTGAGGCCCTGTACTCAAGC              |
| TM08_2.410            | CGGGAAAAACGGTGGGTAC               | GTGAGGCCCTGTACTCAAGC              |
| LstriaMHly_1.1.23870  | ACACGCGGATGAAATCGATAAGTAT         | TTACAGGGAGAACATCTGGTTGATTTT       |
| LstriaMHly_1.1.4447   | AAACGTGATTCATTAACACTCAGCATTG      | ATTGCGCCGAAGTTTACATTCAA           |
| LstriaMHly_1.1.48307  | ATCTTTAGAAGCGAATTCGCCAATATT       | TGTTTCTTTTCGATTGGCGTCTT           |
| LstriaMHly_1.2.114389 | GCAAGCGCTTGGAGTGAA                | GGTTGCCGTCGATGATTTGAA             |
| LstriaMHly_1.2.117774 | GCCTGGTAACGCGAGAAATATTAATGT       | AATTTACGAAGAGTGCAAAACAAGCTT       |
| LstriaMHly_1.2.119256 | GCGCAATCAGTGAAGGGAAAATG           | CGCTTACGGCAGCATCAAAAAG            |
| LstriaMHly_1.2.160507 | TCCATTGCTTATACAACAAACTTCCTA       | TACCAGGCAAATAGATGGACGATGT         |
| LstriaMHly_1.2.87399  | CGGCAACCTCGGAGACTT                | GAGCAACGTATCCTCCAGAGT             |
| TM10_1.360            | CGTTTCTCGAGGCTGTGAG               | TCTGTAGACAGGAACGAGTGG             |
| TM10_2.360            | CGTTTCTCGAGGCTGTGAG               | TCTGTAGACAGGAACGAGTGG             |
| Histo_hcp_1           | GTTTACATCGACTACGGCAACTC           | AATGTCCGTTACCAAGGTATC             |
| C_perf_iap_1.4.4902   | acaatttgtctatctttatgctatagcttgt   | tgcgtttaataaagaaataagaacagaaaatca |
| C_perf_iap_1.5.11298  | ttaagaaaatcttctggtctttcaataaaagc  | attgaatcttaataaactgaattaggagggga  |
| C_perf_iap_1.6.22287  | ttcaagcatctgtagaatatggattttgaat   | aacacatctttaccaactcaattaatgaac    |
| C_perf_iap_1.6.664    | aaaggagatggttggatattaagtaaacct    | acatactcatttgaacagtagttgtag       |
| AMPL1652263_1         | AAATGCTGAAATTCGGCAAATTTGC         | CCTTTCAGGTCTTTTCGCGTGTA           |
| AMPL1652263_2         | AAATGCTGAAATTCGGCAAATTTGC         | CCTTTCAGGTCTTTGGCGTGTA            |
| AMPL1652264           | CCACCTTCTACTTCGAGTACGACA          | CTCTTTACCATAGGAAACCAGTTCCA        |
| Myco_gen_1            | ACCTCCTTTCTACGGAGTACACTT          | CTTCATCGACTTCCAGACCCAA            |
| AMPL1652247           | CATTAGGCGTGAATTATTCATTATCGGAA     | ACCTTCATTTTCCAAATATTGAACGCT       |
| Histo_M_1             | ACAAGAGACGACGGTAGCTTCACG          | GCGTTGGGGATCAAGCGATGAGCC          |
| AMPL1652305           | TATAACAATAATGAGCACATTGTAGGTTATCCG | CAATTAATATATCCCTATTTGGATCGTTGCCT  |
| AMPL1652306_1         | TGCATCTTTAGGATTAGTAGGTACCCAT      | AGGTACAAAGTACCAATCACATGTTAAAGT    |

## Targeted NGS panel for detection of equine pathogens

|                       |                                  |                                 |
|-----------------------|----------------------------------|---------------------------------|
| AMPL1652306_2         | TGCATCTTTAGGATTAGTAGGTACCCAT     | AGGTACAAAGTACCAATCACATcctaaaat  |
| AMPL1652306_3         | TGCATCTTTAGGACTAGTAGGTACCCAT     | AGGTACAAAGTACCAATCACATGTAAAGT   |
| TM07_1.780            | CTGTGATCGATCCGTGGAAGG            | TCGTCTCCAGCGAGAGTACC            |
| TM07_2.780            | CTGTGATCGATCCGTGGAAGG            | TCGTCTCCAGCGAGAGTACC            |
| AMPL1652272           | GCATTCGAAGGTGTCGAGATCA           | GGTTCAGTCTTAAAGAATTTAAGGGTTG    |
| AMPL1652186_1         | CAATTTAAATCCAATGGTGTTCGAAAATGC   | TGATTGGCTAAAGGTACCTGTTTCATTA    |
| AMPL1652186_2         | CAATTTAAATCCAATGGTGTTCGAAAATGC   | TGATTGGCTAAAGGTGCCTGTTTCATTA    |
| AMPL1652284           | TGCGATAAGCTTGATGAGTTGATAAGA      | TCGAATACGGGACTATCACCCCTT        |
| TM09_1.923            | TATCGTTGTAGCGTAACCTGGTC          | CGCGATGATCGATGGTGCA             |
| TM09_2.923            | TATCGTTGTAGCGTAACCTGGTC          | CGCGATGATCGATGGTGCA             |
| AMPL1652270_1         | GCATTTGCAGTCAGGTCCCTAA           | CTAAGTCGTGGAAGTAACTGTGGT        |
| AMPL1652270_2         | GCGTTTGCAGTCAGGTCCCTAA           | CTAAGTCGTGGAAGTAACTGTGGT        |
| APhgcytAnk_1.2.196638 | GTCGCTACCAGCACTTGACAT            | GTATACCCGCAGAAATAGCTGGT         |
| APhgcytAnk_1.3.109934 | CTGCTAAGTTGCTCTTGGATAAAGGG       | AAGCAAGTCTTTGAAAGATGAGTCTGA     |
| APhgcytAnk_1.3.137325 | GCCTGAAAGTCCAACCTCCTTTTAA        | CCTTAGATGACGCCGCATCTG           |
| APhgcytAnk_1.3.146371 | GCTGAAGCACTAACGAATGGTCA          | TACTTGCCTCATTGCGCGCTT           |
| APhgcytAnk_1.3.164485 | GGTATACAAGGAGGGTGCTTTCAG         | CAGTCTTATGGTTGCCAGCAG           |
| APhgcytAnk_1.4.93641  | GCAGAACGAACATCTTCTTCTGG          | AGCTCAGCTGCAAAAGAGCTA           |
| CEM_1                 | GCAGCATAAGGAGAGCTTGCT            | GTAAAAGGTCATCTCTGATCC           |
| AMPL1652308           | ATGAACAACGTTCTGAAATTCTCTGC       | GGCTGGCTTTTTCCAGCATG            |
| AMPL1652187_1         | ATGTTTTTCATGTTTTCTTATTGTTGGAGCA  | TCAAAAGATTTTCAGTTGTTGGTTAGGATCA |
| AMPL1652187_2         | ATGTTTTTCATGTTTTCTTATTGTTGGAGCA  | TCAAAAGATTTTAGTTGTTGGCTAGGATCA  |
| AMPL1652187_3         | ATGTTTTTCATATTTCTTATTGTTGGAGCA   | TCAAAAGATTTTCAGTTGTTGGTTAGGATCA |
| AMPL1652187_5         | ATGTTTTTCATGTTTTCTTATTGTTGGGAGCA | TCAAAAGATTTTCAGTTGTTGGTTAGGATCA |
| AMPL1652281_1         | CAGGGAAACGTCCCTTCTACAA           | CGCTTCCAGTGACTCATCATCG          |
| AMPL1652281_2         | CAGGGAAACGTCCCTTCTACAA           | TGCTTCCAGTGACTCATCATCG          |
| AMPL1652281_3         | CAGGGAAACGTCCCTTCTACAA           | CGCTTCTAGTGACTCATCATCG          |
| AMPL1652281_4         | CAGGGAAACGTCCCTTCTATAA           | CGCTTCCAGTGACTCATCATCG          |
| AMPL1652193           | GGAACGTTCCGGAATGCAAATC           | CGGAAGCACATTGCTGATTCTC          |
| AMPL1652194           | GAAGAAGTGGACCTCACACTGA           | GAAAAGCAGCTGCGGTATTACTTT        |
| AMPL1652176           | TGCACTCGGCTGATCGTTTT             | CGGATAGTTCAGGGTTGTTTGGT         |



## Targeted NGS panel for detection of equine pathogens

|                         |                                |                                 |
|-------------------------|--------------------------------|---------------------------------|
| HPhalbs28S_1.50258      | GAAAACGATTAAGTGGAAGCAAACAGG    | ACGAATGAACCTTTACTTTTCATTATGCC   |
| HPhalbs28S_1.58507      | GCAGCGAACTGTAGCGTATAGG         | CGTTTTACAGTTCTTTTAACCTCTCTCTT   |
| HPhalbs28S_1.7896       | AAGCTCAGCGCTGAATCTCT           | CCTCACGGTACTTGTTTACTATTGGT      |
| CperfEpsln_1.1.12066    | AGTTATTTAGCTTTTCCTAGGGATGGTT   | AATCTTATTTTATTCTGGTGCCTTAATAGAA |
| CperfEpsln_1.1.42002    | TGTCCTTCACAAGATATACTAGTACCA    | ACTATTAACTCATCTCCATAACTGCACTA   |
| CperfEpsln_1.1.42185    | TGTGGGAACTTCGATACAAGCA         | AAATAACTAGGTATCTCTCCCCATTAC     |
| AMPL1652290_1           | GAGCCGAAGTGCGTTTTCTTTT         | TTCCACCCTCCAGGAAAAGCAG          |
| AMPL1652290_2           | GAGCCGAAGTGCGTTTTTTTTT         | TTCCACCCTCCAGGAAAAGCAG          |
| AMPL1652291             | GAGTCGGAGAGGGAGAAGATGT         | AGTGCATCTGGATTCTCTCTCTA         |
| AMPL1652217_1           | GGTAAATGTGAAATATGGAGAATGGAAGGT | CGGTCTAACAGTTTTGTACCATCATTTTCT  |
| AMPL1652217_2           | GGTAAATGTGAAATATGGAGAATGGAAGGT | CGGTCTAACAGTTTTGTGCCATCATTTTCT  |
| AMPL1652217_3           | GGTAAATGTGAAATCTGGAGAATGGAAGGT | CGGTCTAACAGTTTTGTACCATCATTTTCT  |
| AMPL1652217_5           | GGTAAATGTGAAATCTGGCGAATGGAAGGT | CGGTCTAACAGTTTTGTACCATCATTTTCT  |
| APhgcytGroEL_1.1.101234 | GACAAGAACATAGGAAGTAAGATTGCAC   | ACCAGCTCTCGCAACGT               |
| APhgcytGroEL_1.1.107649 | GATGCAGTTGGTTGACTGCTG          | ATGCTAACAATATCAGATCCAGCAGCT     |
| APhgcytGroEL_1.1.18193  | AATGGTATTCTCAAGGCTAAGGAAGC     | TCAGCATTTGTAACAAAGTAAGGCGAA     |
| APhgcytGroEL_1.1.54030  | ATGCTGGTGGAATTTGAAAATCCATAC    | ACTACATACTTAGCGCCTACTATTACGG    |
| APhgcytGroEL_1.2.44429  | GAGCTGGTAGACCATTGCTTATCAT      | AGTTGCGTCTTTTGTGATGCG           |
| TM11_1.601              | CAGCTTTGATTGGCATAAGAGACT       | AGAAGAGGCTTCATCCTCTCC           |
| TM11_2.601              | CAGCTTTGATTGGCATAAGAGACT       | AGAAGAGGCTTCATCCTCTCC           |
| AMPL1652310_1           | ATCCGAAGGCAACGGAATGCAA         | TCATGAACGAAATAACCATTGCTACTATCA  |
| AMPL1652310_2           | ATCCGAAGGCAACGGAATGCAA         | TCATGAACGAAATCATCATTGCTAATATCA  |
| AMPL1652310_3           | ATCCGAAGGCAACAGAATGCAA         | TCATGAACGAAATAACCATTGCTACTATCA  |
| AMPL1652240_1           | AGTAGACACCCTTACTGAAAAGGGA      | CGGATTTTCTGAGTATTTGTCTCAATGTTT  |
| AMPL1652240_2           | AGTAGACACCCTTACTGAAAAGGGA      | CGGATTTTCTGAGTATTTTCTCAATGTTT   |
| AMPL1652240_3           | AGTAGACACCCTTACTGAAAAAGGA      | CGGATTTTCTGAGTATTTGTCTCAATGTTT  |
| AMPL1652241_1           | GTGATGACATTTGTTATCCAGGCAAATT   | GTAGGATTTTGTGATTTGTGGGAATACC    |
| AMPL1652241_2           | GTGATGACATTTGTTATCCAGGCAAATT   | GTAGGACTTTGTGATTTGTGGAAATACC    |
| AMPL1652241_3           | GTAATGACATTTGTTATCCAGGCAAATT   | GTAGGATTTTGTGATTTGTGGGAATACC    |
| AMPL1652241_5           | GTGATGATATTTGTTATCCAGGCAAATT   | GTAGGATTTTGTGATTTGTGGGAATACC    |
| AMPL1652241_7           | GTGATGACATTTGCTATCCAGGCAAATT   | GTAGGATTTTGTGATTTGTGGGAATACC    |

Targeted NGS panel for detection of equine pathogens

|               |                               |                                |
|---------------|-------------------------------|--------------------------------|
| TM04_1.1251   | CTCACAGACAGCCCTTCTGTT         | GGAGCAACGAGGACTCTGT            |
| TM04_2.1251   | CTCACAGACAGCCCTTCTGTT         | GGAGCAACGAGGACTCTGT            |
| AMPL1652229_1 | GGCGATGGTTAGTCAAGCTTCT        | ATGCCACATTCAACGGTCAAAC         |
| AMPL1652229_2 | GGCGATGGTTAGTCAAACCTTCT       | ATGCCACATTCAACGGTCAAAC         |
| AMPL1652230   | CTGACAACAACGGCACCATTGAC       | GCCATTGTCGACTCCAGATCAC         |
| AMPL1652286   | CAGTGCTCGTTTACGACCTGAA        | AAGATAAGACGGCTGGTACTGATTG      |
| AMPL1652184   | ACTATAGTCATGCTAGCATGAGTCATAGT | AGTTTTTCCATCCTTTGTTTTGATTCCAAA |
| AMPL1652185_1 | GTGAGAAAGATGCTGGAACAGATG      | GGCTTATAAGCATCTGAGAATGCTGTATAT |
| AMPL1652185_2 | GTGAAAAAGATGCTGGAACAGATG      | GGCTTATAAGCATCTGAGAATGCTGTATAT |
| AMPL1652222   | AAAACCCAATCAGTGGCAATAACAC     | AGCGCTGCTTCTTTCTATAAAGAGG      |
| AMPL1652223   | CCACTGTGACGCCTTTCAGTAT        | TAAGAGCTTCCAGATTTTGTTAGCCAA    |
| AMPL1652058_1 | GCCAGGCTGGTGGATTACAATT        | GTTGACTGTGATAGCGCCTGAT         |
| AMPL1652058_2 | GCCAGGCTGGTGGATTACAATT        | GCTGACTGTGATAGCGCCTGAT         |
| AMPL1652058_3 | TCCAGGCTGGTGGATTACAATT        | GTTGACTGTGATAGCGCCTGAT         |
| AMPL1652251   | ATACAGACCAAGCACGAGAAAAGCTA    | TGAGCATGGGCCTTTAGCAAAT         |
| AMPL1652252   | CCCTGGAAGAAAAGTGTCCCAA        | GTTTTCTGTACCTGTATCCCCTT        |
| AMPL1652253   | GCAAGAAGTGGCTGAAACAACC        | TGTAGATGGTGGTCGAGGTCAT         |
| AMPL1652254_1 | CCGGGAACCAGATGTACAAGTA        | GCTGTCCCTGCCATGATCTATG         |
| AMPL1652254_2 | CTGGGAACCAGATGTACAAGTA        | GCTGTCCCTGCCATGATCTATG         |
